# Supplementary material
Source: publisher figshare collection journal article supplement (https://acs.figshare.com/ndownloader/files/3637395)
Supplement: Supplementary file 1 [file 3637395]

# Examples of effective data sharing in scientific publishing

John R. Kitchin\*

*Department of Chemical Engineering, Carnegie Mellon University, 5000 Forbes Ave,  
Pittsburgh, PA 15213*

E-mail: [jkitchin@andrew.cmu.edu](mailto:jkitchin@andrew.cmu.edu)

---

\*To whom correspondence should be addressed

language: sh

Listing 3: Shell command to print the contents of the INCAR to the console.

---

```
cat INCAR
```

---

```
PREC = Normal
```

```
ISIF = 2
```

```
IBRION = 2
```

```
NBANDS = 156
```

```
ENCUT = 450.0
```

```
NSW = 30
```

language: python

Listing 4: Python script to read the POTCAR file information for a specific calculation.

---

```
import json
import numpy as np

with open('data.json', 'rb') as f:
    d = json.loads(f.read())

calc = d['results']['HPd']['cln'][0]

print 'POTCARS:'
for sym, potcar, githash in calc['potcar']:
    print(sym, potcar, githash)
```

---

POTCARS:

(u'H', u'potpaw\_PBE/H/POTCAR', u'fbc0773b08b32f553234b0b50cc6ad6f5085c816')

(u'Pd', u'potpaw\_PBE/Pd/POTCAR', u'abec334aaffe253d3b9fb835c3a06cba6c014023')

language: python

Listing 5: Python script to read the other calculation parameters such as k-point sampling, and exchange-correlation functional.

---

```
import json
import numpy as np

with open('data.json', 'rb') as f:
    d = json.loads(f.read())

calc = d['results']['HPd']['c1n'][0]

print 'OTHER INPUT:'
for key, val in calc['input'].items():
    print('{0} = {1}'.format(key, val))
```

---

OTHER INPUT:

```
kpts = [10, 10, 1]
reciprocal = False
xc = PBE
kpts_nintersections = None
setups = {}
txt = -
gamma = False
```
